# Supplementary material for: The effects of alternative splicing on miRNA binding sites in bladder cancer
Source: PubMed Central journal article supplement (PMC5754136; doi:10.1371/journal.pone.0190708), 2018-01-04
Supplement: pone.0190708.s001.pdf [file pone.0190708.s001.pdf]

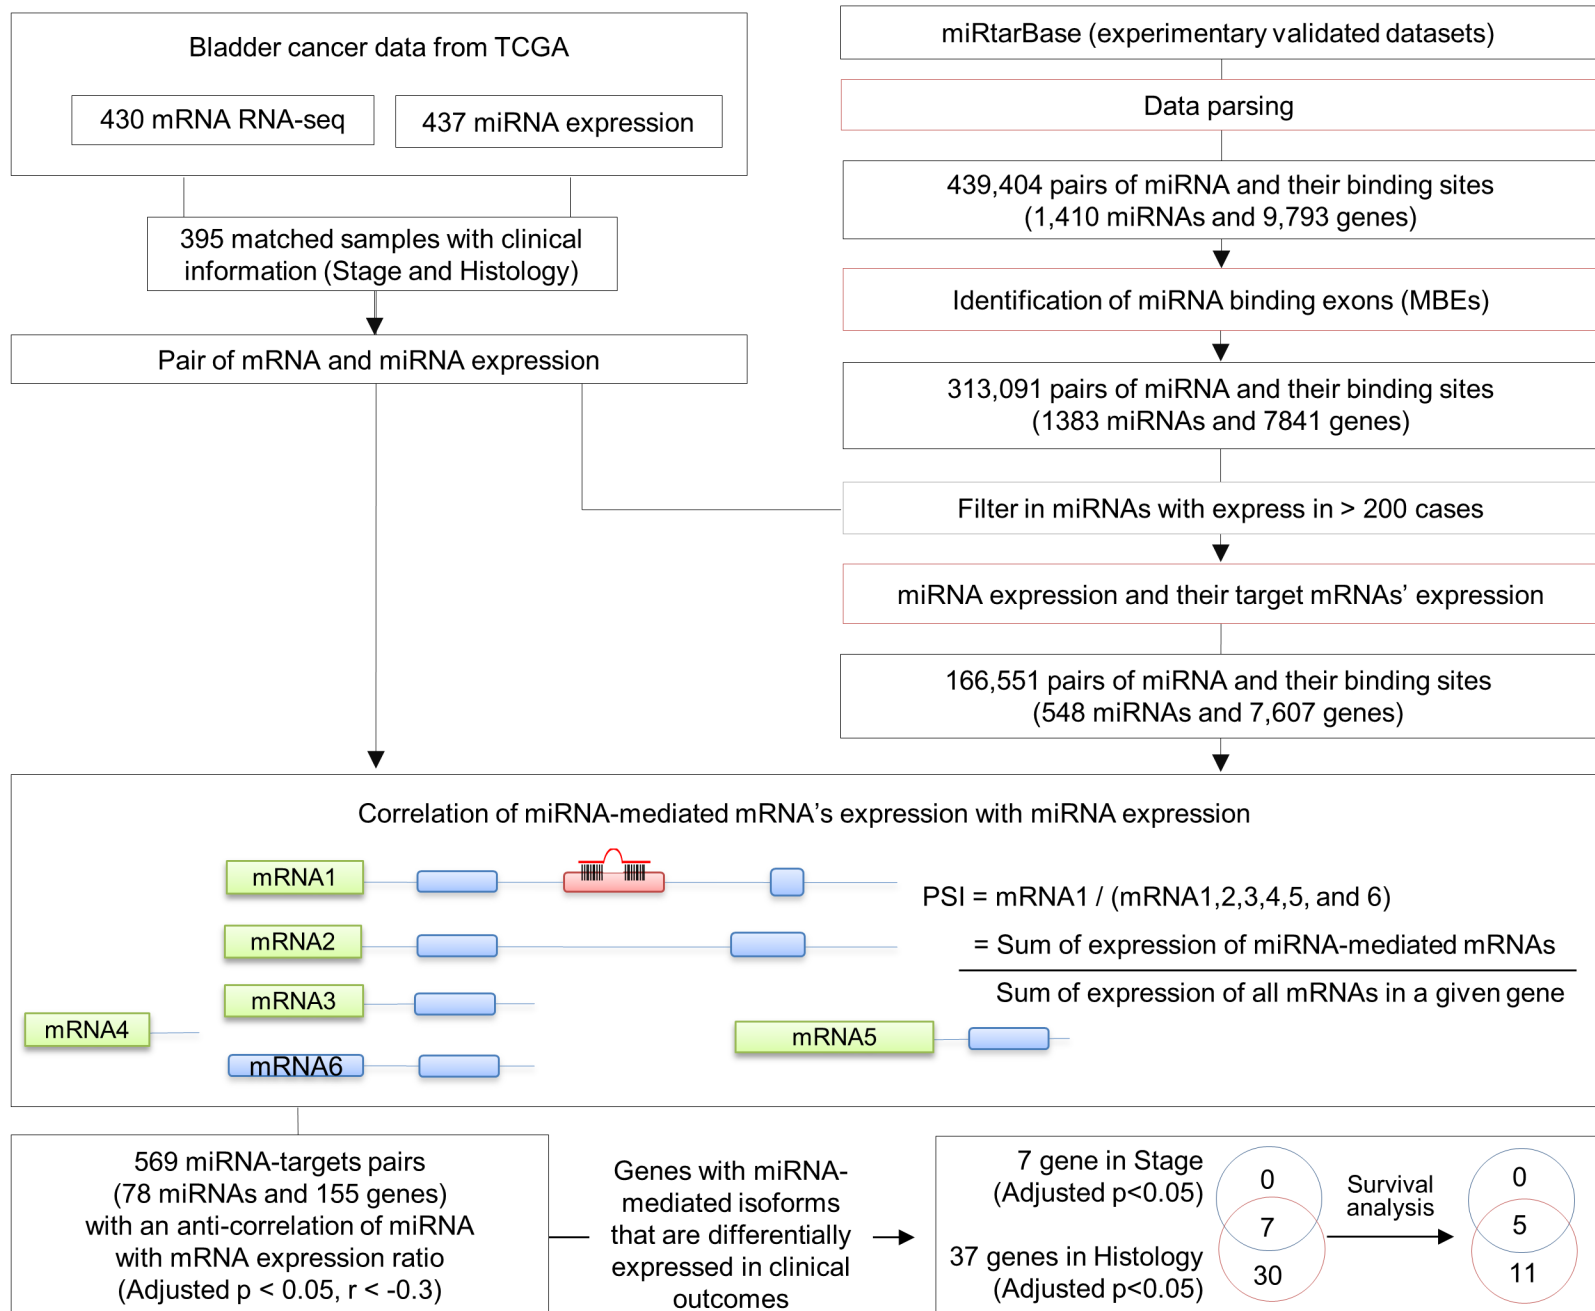

**S1 Fig. A summary of results produced in each step described in Fig 1.**
