# Supplementary material for: The effects of alternative splicing on miRNA binding sites in bladder cancer
Source: PubMed Central journal article supplement (PMC5754136; doi:10.1371/journal.pone.0190708), 2018-01-04
Supplement: pone.0190708.s002.pdf [file pone.0190708.s002.pdf]

**A**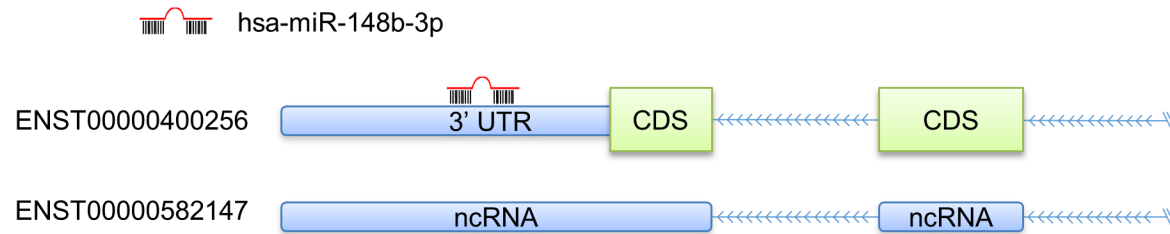**B**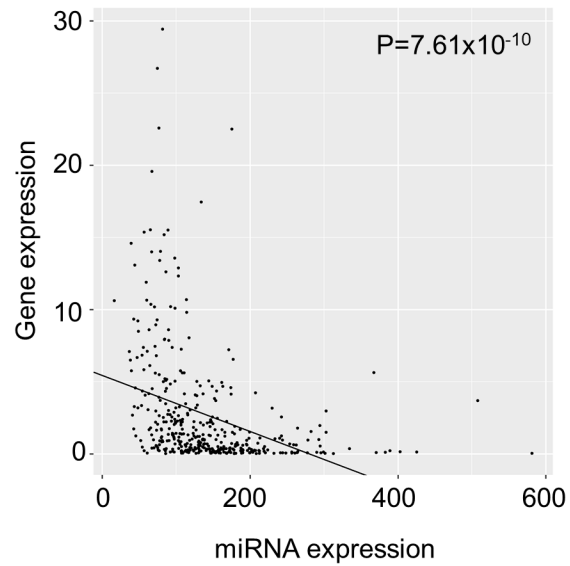**C**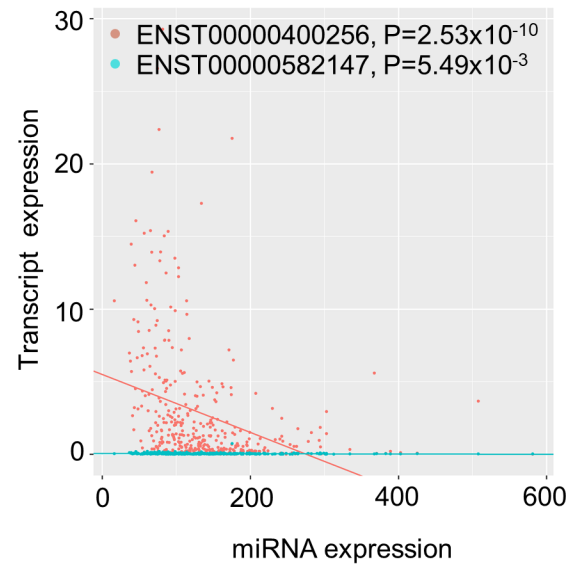**D**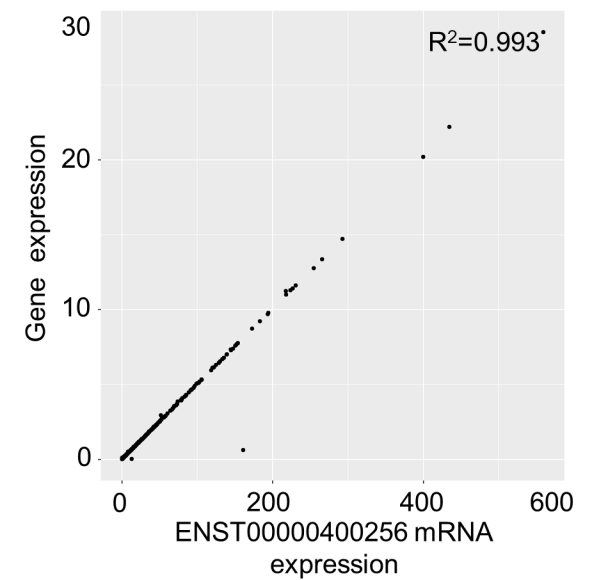

**S2 Fig. Concordant impacts of hsa-miR-148b-3p on mRNA and gene-level expression in COLEC12.**
