# Supplementary material for: The effects of alternative splicing on miRNA binding sites in bladder cancer
Source: PubMed Central journal article supplement (PMC5754136; doi:10.1371/journal.pone.0190708), 2018-01-04
Supplement: pone.0190708.s003.pdf [file pone.0190708.s003.pdf]

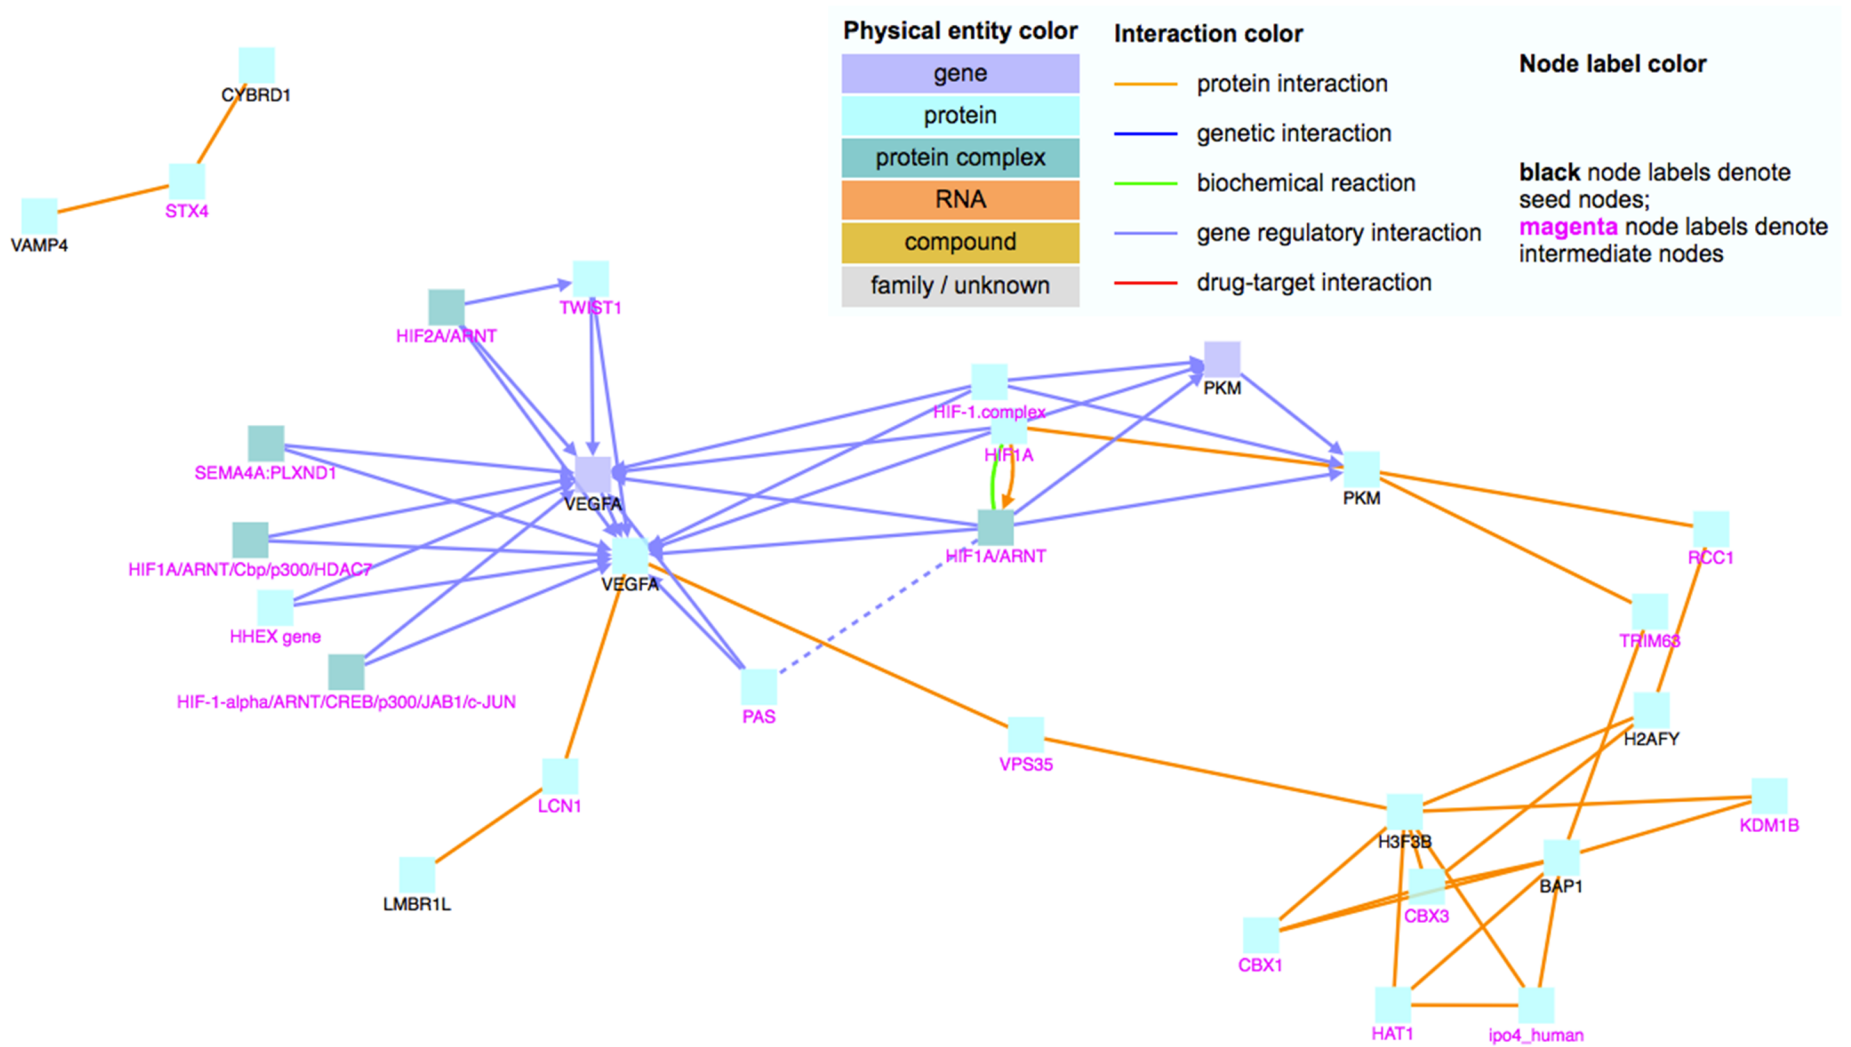

**S3 Fig. Induced network modules analysis of the associated survival of 16 genes.** Nodes with black labels are seed genes ; nodes with purple labels are intermediate nodes.
