# Supplementary material for: The effects of alternative splicing on miRNA binding sites in bladder cancer
Source: PubMed Central journal article supplement (PMC5754136; doi:10.1371/journal.pone.0190708), 2018-01-04
Supplement: pone.0190708.s004.pdf [file pone.0190708.s004.pdf]

**Table S1. Seventy-eight miRNAs and 155 genes that are inversely correlated between mRNA and miRNA expression.**

| Gene symbol | miRNA ID        | Target site in 3' UTR | P-value  | Correlation |
|-------------|-----------------|-----------------------|----------|-------------|
| EPB41       | hsa-miR-30e-5p  | 1:29445335-29445358   | 3.73E-14 | -0.358      |
| EPB41       | hsa-miR-30e-5p  | 1:29445459-29445479   | 3.73E-14 | -0.358      |
| EPB41       | hsa-miR-30c-5p  | 1:29445459-29445479   | 1.38E-10 | -0.306      |
| EPB41       | hsa-miR-30c-5p  | 1:29445337-29445358   | 1.38E-10 | -0.306      |
| EPB41       | hsa-miR-30e-5p  | 1:29445243-29445263   | 3.73E-14 | -0.358      |
| S100PBP     | hsa-miR-30e-5p  | 1:33322318-33322339   | 7.45E-14 | -0.354      |
| S100PBP     | hsa-miR-30c-5p  | 1:33322319-33322339   | 1.32E-13 | -0.351      |
| S100PBP     | hsa-miR-30c-5p  | 1:33323446-33323469   | 4.29E-13 | -0.344      |
| S100PBP     | hsa-miR-30e-5p  | 1:33323452-33323469   | 1.65E-13 | -0.349      |
| S100PBP     | hsa-miR-30c-5p  | 1:33324268-33324294   | 4.29E-13 | -0.344      |
| S100PBP     | hsa-miR-30e-5p  | 1:33324282-33324303   | 1.65E-13 | -0.349      |
| SH3GLB1     | hsa-miR-21-3p   | 1:87211679-87211701   | 1.46E-10 | -0.306      |
| SH3GLB1     | hsa-miR-29a-5p  | 1:87209437-87209458   | 1.03E-10 | -0.309      |
| SH3GLB1     | hsa-miR-21-3p   | 1:87210127-87210154   | 1.46E-10 | -0.306      |
| SH3GLB1     | hsa-miR-21-3p   | 1:87210680-87210700   | 1.46E-10 | -0.306      |
| SH3GLB1     | hsa-miR-29a-5p  | 1:87211155-87211176   | 1.03E-10 | -0.309      |
| SH3GLB1     | hsa-miR-29a-5p  | 1:87211192-87211214   | 1.03E-10 | -0.309      |
| SDHC        | hsa-miR-320a    | 1:161332514-161332536 | 1.11E-13 | -0.352      |
| SDHC        | hsa-miR-320a    | 1:161332443-161332466 | 1.11E-13 | -0.352      |
| RCOR3       | hsa-miR-200c-3p | 1:211486390-211486411 | 1.71E-13 | -0.349      |
| RCOR3       | hsa-miR-200c-3p | 1:211486565-211486586 | 1.71E-13 | -0.349      |
| RCOR3       | hsa-miR-200c-3p | 1:211486458-211486483 | 1.71E-13 | -0.349      |
| KCTD3       | hsa-miR-30c-5p  | 1:215794637-215794660 | 4.75E-11 | -0.314      |
| KCTD3       | hsa-miR-30c-5p  | 1:215794430-215794452 | 4.75E-11 | -0.314      |
| KCTD3       | hsa-miR-30c-5p  | 1:215794402-215794424 | 4.75E-11 | -0.314      |
| CAPN2       | hsa-miR-101-3p  | 1:223963052-223963075 | 8.77E-11 | -0.310      |
| CAPN2       | hsa-miR-101-3p  | 1:223963489-223963512 | 8.77E-11 | -0.310      |
| CAPN2       | hsa-miR-101-3p  | 1:223963352-223963374 | 8.77E-11 | -0.310      |
| SRM         | hsa-miR-423-5p  | 1:11114700-11114674   | 1.37E-13 | -0.351      |
| SRM         | hsa-miR-423-5p  | 1:11114763-11114741   | 1.88E-13 | -0.349      |
| SRM         | hsa-miR-320a    | 1:11114735-11114709   | 1.07E-12 | -0.338      |
| SRM         | hsa-miR-320a    | 1:11114823-11114803   | 9.45E-13 | -0.339      |
| SRM         | hsa-miR-423-5p  | 1:11114873-11114852   | 1.88E-13 | -0.349      |
| SRM         | hsa-miR-320a    | 1:11114704-11114686   | 1.07E-12 | -0.338      |
| SFPQ        | hsa-miR-141-3p  | 1:35648913-35648892   | 1.02E-10 | -0.309      |
| C1orf123    | hsa-miR-30e-5p  | 1:53679888-53679864   | 6.01E-22 | -0.446      |
| C1orf123    | hsa-miR-30e-5p  | 1:53679969-53679945   | 6.01E-22 | -0.446      |
| C1orf123    | hsa-miR-30e-5p  | 1:53680032-53680009   | 6.01E-22 | -0.446      |
| TGFBR3      | hsa-miR-27a-3p  | 1:92146323-92146297   | 4.27E-12 | -0.330      |
| SLC16A1     | hsa-miR-29c-3p  | 1:113456449-113456425 | 1.60E-17 | -0.399      |
| SLC16A1     | hsa-miR-29c-3p  | 1:113456170-113456147 | 1.60E-17 | -0.399      |
| SLC16A1     | hsa-miR-29c-3p  | 1:113455473-113455452 | 1.60E-17 | -0.399      |
| SLC16A1     | hsa-miR-29c-3p  | 1:113456503-113456479 | 1.60E-17 | -0.399      |

|          |                 |                       |          |        |
|----------|-----------------|-----------------------|----------|--------|
| CSDE1    | hsa-miR-15b-5p  | 1:115259852-115259827 | 1.66E-11 | -0.321 |
| NOTCH2   | hsa-miR-29b-5p  | 1:120456828-120456805 | 8.29E-11 | -0.312 |
| NOTCH2   | hsa-miR-29b-5p  | 1:120457011-120456987 | 8.29E-11 | -0.312 |
| NOTCH2   | hsa-miR-29b-5p  | 1:120455597-120455574 | 8.29E-11 | -0.312 |
| CDC42SE1 | hsa-miR-29c-3p  | 1:151024524-151024503 | 2.81E-14 | -0.360 |
| CDC42SE1 | hsa-miR-29c-3p  | 1:151025335-151025313 | 2.81E-14 | -0.360 |
| ADAMTS4  | hsa-miR-143-3p  | 1:161159924-161159902 | 1.45E-13 | -0.350 |
| ADAMTS4  | hsa-miR-143-3p  | 1:161160227-161160203 | 1.45E-13 | -0.350 |
| ADAMTS4  | hsa-miR-143-3p  | 1:161160107-161160086 | 1.45E-13 | -0.350 |
| VAMP4    | hsa-miR-223-5p  | 1:171671052-171671031 | 6.76E-10 | -0.303 |
| VAMP4    | hsa-miR-223-5p  | 1:171670144-171670116 | 5.17E-10 | -0.305 |
| MRPS14   | hsa-miR-27a-3p  | 1:174983098-174983079 | 5.68E-16 | -0.381 |
| MRPS14   | hsa-miR-27a-3p  | 1:174982662-174982644 | 5.68E-16 | -0.381 |
| FAM129A  | hsa-miR-106a-5p | 1:184763760-184763741 | 2.22E-10 | -0.303 |
| FAM129A  | hsa-miR-106a-5p | 1:184761356-184761334 | 2.22E-10 | -0.303 |
| FAM129A  | hsa-miR-20b-5p  | 1:184763767-184763741 | 1.05E-10 | -0.308 |
| FAM129A  | hsa-miR-20b-5p  | 1:184761356-184761334 | 1.05E-10 | -0.308 |
| FAM129A  | hsa-miR-17-5p   | 1:184763760-184763741 | 2.13E-10 | -0.303 |
| FAM129A  | hsa-miR-106a-5p | 1:184763789-184763769 | 2.22E-10 | -0.303 |
| FAM129A  | hsa-miR-92a-3p  | 1:184763363-184763343 | 4.95E-11 | -0.314 |
| FAM129A  | hsa-miR-92a-3p  | 1:184762666-184762649 | 4.95E-11 | -0.314 |
| FAM129A  | hsa-miR-20b-5p  | 1:184763789-184763769 | 1.05E-10 | -0.308 |
| FAM129A  | hsa-miR-17-5p   | 1:184761356-184761334 | 2.13E-10 | -0.303 |
| FAM129A  | hsa-miR-92a-3p  | 1:184763779-184763756 | 4.95E-11 | -0.314 |
| FAM129A  | hsa-miR-93-5p   | 1:184761356-184761334 | 4.00E-15 | -0.371 |
| FAM129A  | hsa-miR-92a-3p  | 1:184764105-184764082 | 4.95E-11 | -0.314 |
| FAM129A  | hsa-miR-17-5p   | 1:184763789-184763769 | 2.13E-10 | -0.303 |
| FAM129A  | hsa-miR-93-5p   | 1:184763760-184763741 | 4.00E-15 | -0.371 |
| FAM129A  | hsa-miR-93-5p   | 1:184760903-184760881 | 4.00E-15 | -0.371 |
| SNX17    | hsa-let-7g-5p   | 2:27599681-27599702   | 1.66E-16 | -0.388 |
| SNX17    | hsa-let-7g-5p   | 2:27599723-27599740   | 1.66E-16 | -0.388 |
| CLIP4    | hsa-miR-15b-5p  | 2:29405489-29405517   | 1.20E-11 | -0.323 |
| CLIP4    | hsa-miR-15b-5p  | 2:29405832-29405857   | 1.20E-11 | -0.323 |
| CLIP4    | hsa-miR-15b-5p  | 2:29405456-29405479   | 1.20E-11 | -0.323 |
| PRKCE    | hsa-miR-21-5p   | 2:46412628-46412653   | 1.55E-13 | -0.350 |
| PRKCE    | hsa-miR-21-5p   | 2:46414518-46414537   | 1.55E-13 | -0.350 |
| PRKCE    | hsa-miR-21-5p   | 2:46413112-46413137   | 1.55E-13 | -0.350 |
| UGGT1    | hsa-miR-21-5p   | 2:128951157-128951179 | 5.02E-11 | -0.313 |
| UGGT1    | hsa-miR-21-5p   | 2:128949573-128949602 | 5.02E-11 | -0.313 |
| CYBRD1   | hsa-miR-92a-3p  | 2:172412677-172412698 | 3.36E-17 | -0.396 |
| CYBRD1   | hsa-miR-92a-3p  | 2:172413296-172413322 | 3.36E-17 | -0.396 |
| CYBRD1   | hsa-miR-92a-3p  | 2:172412457-172412479 | 3.36E-17 | -0.396 |
| XRCC5    | hsa-miR-29b-5p  | 2:217070725-217070751 | 3.18E-10 | -0.303 |
| XRCC5    | hsa-miR-29b-5p  | 2:217070413-217070440 | 3.18E-10 | -0.303 |
| XRCC5    | hsa-miR-29b-5p  | 2:217070281-217070304 | 3.18E-10 | -0.303 |
| GPC1     | hsa-miR-149-3p  | 2:241406705-241406725 | 2.84E-13 | -0.383 |
| GPC1     | hsa-miR-149-5p  | 2:241407258-241407279 | 3.03E-10 | -0.301 |

|        |                 |                       |          |        |
|--------|-----------------|-----------------------|----------|--------|
| GPC1   | hsa-miR-149-5p  | 2:241405900-241405929 | 3.03E-10 | -0.301 |
| GPC1   | hsa-miR-149-5p  | 2:241405800-241405823 | 3.03E-10 | -0.301 |
| GPC1   | hsa-miR-149-3p  | 2:241406926-241406948 | 2.84E-13 | -0.383 |
| GPC1   | hsa-miR-149-3p  | 2:241405969-241405990 | 2.84E-13 | -0.383 |
| DNMT3A | hsa-miR-143-3p  | 2:25456067-25456044   | 6.55E-14 | -0.355 |
| DNMT3A | hsa-miR-143-3p  | 2:25456826-25456806   | 6.55E-14 | -0.355 |
| DNMT3A | hsa-miR-143-3p  | 2:25456967-25456950   | 6.55E-14 | -0.355 |
| SLC8A1 | hsa-miR-1-3p    | 2:40340448-40340427   | 1.22E-18 | -0.412 |
| SLC8A1 | hsa-miR-1-3p    | 2:40341112-40341091   | 1.22E-18 | -0.412 |
| SLC8A1 | hsa-miR-1-3p    | 2:40340549-40340525   | 1.22E-18 | -0.412 |
| MCFD2  | hsa-miR-191-5p  | 2:47130496-47130478   | 3.39E-11 | -0.316 |
| MCFD2  | hsa-miR-191-5p  | 2:47130942-47130923   | 3.39E-11 | -0.316 |
| MCFD2  | hsa-miR-191-5p  | 2:47130874-47130849   | 3.39E-11 | -0.316 |
| SMEK2  | hsa-miR-106b-5p | 2:55776147-55776126   | 1.23E-10 | -0.307 |
| SMEK2  | hsa-miR-106b-5p | 2:55777026-55777006   | 1.23E-10 | -0.307 |
| SMEK2  | hsa-miR-106b-5p | 2:55776382-55776362   | 1.23E-10 | -0.307 |
| SMEK2  | hsa-miR-106b-5p | 2:55776244-55776224   | 1.23E-10 | -0.307 |
| MRPS5  | hsa-miR-320a    | 2:95752975-95752953   | 4.84E-11 | -0.314 |
| SEMA4C | hsa-let-7g-5p   | 2:97526168-97526145   | 2.48E-13 | -0.347 |
| SEMA4C | hsa-miR-125a-5p | 2:97525794-97525768   | 4.32E-11 | -0.314 |
| SEMA4C | hsa-let-7g-5p   | 2:97526355-97526331   | 2.48E-13 | -0.347 |
| SEMA4C | hsa-miR-125a-5p | 2:97526309-97526285   | 4.32E-11 | -0.314 |
| SEMA4C | hsa-let-7g-5p   | 2:97526313-97526289   | 2.48E-13 | -0.347 |
| SEMA4C | hsa-miR-125a-5p | 2:97525833-97525809   | 4.32E-11 | -0.314 |
| SEMA4C | hsa-let-7g-5p   | 2:97526355-97526333   | 2.48E-13 | -0.347 |
| SEMA4C | hsa-let-7g-5p   | 2:97525916-97525898   | 2.48E-13 | -0.347 |
| GTF3C3 | hsa-miR-29b-5p  | 2:197629184-197629163 | 3.45E-11 | -0.318 |
| GTF3C3 | hsa-miR-29b-5p  | 2:197629261-197629237 | 3.45E-11 | -0.318 |
| ACY1   | hsa-miR-96-5p   | 3:52023104-52023123   | 1.57E-10 | -0.306 |
| ACY1   | hsa-miR-96-5p   | 3:52023096-52023120   | 1.57E-10 | -0.306 |
| FNDC3B | hsa-miR-155-5p  | 3:172115927-172115951 | 5.86E-11 | -0.312 |
| BAP1   | hsa-miR-429     | 3:52436232-52436214   | 5.13E-14 | -0.356 |
| BAP1   | hsa-miR-141-3p  | 3:52436232-52436214   | 2.54E-10 | -0.302 |
| BAP1   | hsa-miR-200c-3p | 3:52436234-52436214   | 4.27E-12 | -0.330 |
| BAP1   | hsa-miR-200a-3p | 3:52435545-52435525   | 5.73E-12 | -0.328 |
| BAP1   | hsa-miR-200a-3p | 3:52435596-52435574   | 5.73E-12 | -0.328 |
| BAP1   | hsa-miR-429     | 3:52435460-52435435   | 2.95E-11 | -0.317 |
| BAP1   | hsa-miR-429     | 3:52435546-52435525   | 2.95E-11 | -0.317 |
| BAP1   | hsa-miR-200b-3p | 3:52436232-52436214   | 1.38E-18 | -0.411 |
| BAP1   | hsa-miR-200b-3p | 3:52435459-52435435   | 2.36E-15 | -0.374 |
| BAP1   | hsa-miR-200b-3p | 3:52435545-52435525   | 2.36E-15 | -0.374 |
| BAP1   | hsa-miR-200a-3p | 3:52435421-52435398   | 5.73E-12 | -0.328 |
| NT5DC2 | hsa-miR-423-3p  | 3:52558480-52558458   | 2.62E-11 | -0.318 |
| NT5DC2 | hsa-miR-423-3p  | 3:52558453-52558429   | 2.62E-11 | -0.318 |
| KLHL6  | hsa-miR-10a-5p  | 3:183208354-183208330 | 1.50E-14 | -0.363 |
| KLHL6  | hsa-miR-10a-5p  | 3:183209698-183209674 | 1.50E-14 | -0.363 |
| KLHL6  | hsa-miR-10a-5p  | 3:183207003-183206977 | 1.50E-14 | -0.363 |

|        |                 |                       |          |        |
|--------|-----------------|-----------------------|----------|--------|
| ACAP2  | hsa-miR-129-5p  | 3:194999390-194999370 | 7.39E-13 | -0.347 |
| ACAP2  | hsa-miR-129-5p  | 3:194998072-194998046 | 7.39E-13 | -0.347 |
| ACAP2  | hsa-miR-129-5p  | 3:194997575-194997553 | 7.39E-13 | -0.347 |
| PCGF3  | hsa-let-7i-5p   | 4:759869-759891       | 1.88E-10 | -0.304 |
| FBXL5  | hsa-miR-130b-3p | 4:15607307-15607286   | 1.60E-11 | -0.321 |
| FBXL5  | hsa-miR-17-5p   | 4:15606657-15606637   | 1.59E-15 | -0.376 |
| FBXL5  | hsa-miR-17-5p   | 4:15607305-15607284   | 1.59E-15 | -0.376 |
| FBXL5  | hsa-miR-93-5p   | 4:15607305-15607284   | 2.81E-14 | -0.360 |
| FBXL5  | hsa-miR-93-5p   | 4:15606937-15606915   | 2.81E-14 | -0.360 |
| LCORL  | hsa-miR-21-5p   | 4:17884549-17884525   | 1.01E-11 | -0.324 |
| LCORL  | hsa-miR-21-5p   | 4:17884691-17884670   | 1.01E-11 | -0.324 |
| LCORL  | hsa-miR-21-5p   | 4:17883188-17883167   | 1.01E-11 | -0.324 |
| ARAP2  | hsa-miR-101-3p  | 4:36069222-36069198   | 1.67E-11 | -0.321 |
| ARAP2  | hsa-miR-101-3p  | 4:36069517-36069493   | 1.67E-11 | -0.321 |
| ARAP2  | hsa-miR-101-3p  | 4:36068144-36068122   | 1.67E-11 | -0.321 |
| ARAP2  | hsa-miR-101-3p  | 4:36068618-36068597   | 1.67E-11 | -0.321 |
| GNPDA2 | hsa-miR-106b-5p | 4:44705072-44705054   | 1.74E-21 | -0.442 |
| GNPDA2 | hsa-miR-106b-5p | 4:44704487-44704461   | 4.81E-20 | -0.427 |
| GNPDA2 | hsa-miR-106b-5p | 4:44704248-44704226   | 4.81E-20 | -0.427 |
| FAM13A | hsa-miR-2355-5p | 4:89648836-89648816   | 6.14E-11 | -0.312 |
| FAM13A | hsa-miR-2355-5p | 4:89648088-89648068   | 2.19E-10 | -0.303 |
| FAM13A | hsa-miR-2355-5p | 4:89647229-89647207   | 2.19E-10 | -0.303 |
| RNF150 | hsa-miR-148b-3p | 4:141787875-141787853 | 3.15E-12 | -0.331 |
| RNF150 | hsa-miR-148b-3p | 4:141788505-141788486 | 3.15E-12 | -0.331 |
| RNF150 | hsa-miR-148b-3p | 4:141788992-141788971 | 3.15E-12 | -0.331 |
| YTHDC2 | hsa-miR-30c-5p  | 5:112929409-112929431 | 3.35E-10 | -0.300 |
| YTHDC2 | hsa-miR-30c-5p  | 5:112929264-112929290 | 3.35E-10 | -0.300 |
| LYRM7  | hsa-miR-21-5p   | 5:130538995-130539018 | 1.30E-10 | -0.307 |
| LYRM7  | hsa-miR-21-5p   | 5:130540654-130540685 | 1.30E-10 | -0.307 |
| LYRM7  | hsa-miR-21-5p   | 5:130538114-130538136 | 1.30E-10 | -0.307 |
| KDM3B  | hsa-miR-101-3p  | 5:137772268-137772296 | 2.91E-10 | -0.301 |
| KDM3B  | hsa-miR-101-3p  | 5:137772529-137772556 | 2.91E-10 | -0.301 |
| MTMR12 | hsa-miR-1-3p    | 5:32228952-32228931   | 9.99E-15 | -0.366 |
| MTMR12 | hsa-miR-1-3p    | 5:32227852-32227829   | 9.99E-15 | -0.366 |
| MTMR12 | hsa-miR-1-3p    | 5:32227711-32227686   | 9.99E-15 | -0.366 |
| ANKRA2 | hsa-miR-30e-5p  | 5:72848218-72848198   | 3.95E-13 | -0.344 |
| ANKRA2 | hsa-miR-30e-5p  | 5:72848606-72848585   | 3.95E-13 | -0.344 |
| ANKRA2 | hsa-miR-30e-5p  | 5:72848580-72848552   | 3.95E-13 | -0.344 |
| H2AFY  | hsa-miR-148b-3p | 5:134670644-134670623 | 4.35E-11 | -0.314 |
| H2AFY  | hsa-miR-148b-3p | 5:134670499-134670476 | 3.33E-11 | -0.316 |
| H2AFY  | hsa-miR-148b-3p | 5:134670312-134670288 | 3.33E-11 | -0.316 |
| H2AFY  | hsa-miR-148b-3p | 5:134670468-134670447 | 3.33E-11 | -0.316 |
| NR3C1  | hsa-miR-155-5p  | 5:142657855-142657828 | 2.53E-25 | -0.478 |
| CAMK2A | hsa-miR-149-3p  | 5:149601884-149601863 | 3.46E-10 | -0.334 |
| CAMK2A | hsa-miR-149-3p  | 5:149600531-149600509 | 3.46E-10 | -0.334 |
| CAMK2A | hsa-miR-149-3p  | 5:149599941-149599920 | 3.46E-10 | -0.334 |
| BOD1   | hsa-miR-29b-5p  | 5:173035276-173035252 | 3.92E-12 | -0.332 |

|        |                 |                       |          |        |
|--------|-----------------|-----------------------|----------|--------|
| PDLIM7 | hsa-miR-1-3p    | 5:176917469-176917448 | 5.19E-26 | -0.484 |
| PDLIM7 | hsa-miR-1-3p    | 5:176917309-176917290 | 5.19E-26 | -0.484 |
| PDLIM7 | hsa-miR-1-3p    | 5:176917275-176917254 | 5.19E-26 | -0.484 |
| BTN3A1 | hsa-miR-106b-5p | 6:26414110-26414129   | 5.52E-15 | -0.369 |
| BTN3A1 | hsa-miR-106b-5p | 6:26414317-26414338   | 3.90E-14 | -0.358 |
| BTN3A1 | hsa-miR-106b-5p | 6:26415073-26415093   | 3.90E-14 | -0.358 |
| BTN3A3 | hsa-miR-106b-5p | 6:26452990-26453013   | 2.81E-10 | -0.302 |
| PTK7   | hsa-miR-324-5p  | 6:43128957-43128995   | 9.58E-11 | -0.309 |
| PTK7   | hsa-miR-324-5p  | 6:43128653-43128675   | 2.20E-10 | -0.303 |
| PTK7   | hsa-miR-324-5p  | 6:43128783-43128805   | 9.58E-11 | -0.309 |
| PTK7   | hsa-miR-324-5p  | 6:43128621-43128641   | 2.20E-10 | -0.303 |
| VEGFA  | hsa-miR-101-3p  | 6:43754048-43754069   | 2.09E-10 | -0.304 |
| VEGFA  | hsa-miR-101-3p  | 6:43753528-43753549   | 2.09E-10 | -0.304 |
| VEGFA  | hsa-miR-200c-3p | 6:43753598-43753620   | 1.52E-18 | -0.411 |
| VEGFA  | hsa-miR-200c-3p | 6:43754105-43754131   | 1.52E-18 | -0.411 |
| VEGFA  | hsa-miR-93-5p   | 6:43754190-43754212   | 2.76E-11 | -0.317 |
| VEGFA  | hsa-miR-200c-3p | 6:43753745-43753772   | 1.52E-18 | -0.411 |
| VEGFA  | hsa-miR-101-3p  | 6:43753372-43753393   | 2.09E-10 | -0.304 |
| VEGFA  | hsa-miR-200b-3p | 6:43753599-43753620   | 2.16E-25 | -0.478 |
| VEGFA  | hsa-miR-200b-3p | 6:43752956-43752974   | 2.16E-25 | -0.478 |
| VEGFA  | hsa-miR-200b-3p | 6:43754106-43754131   | 2.16E-25 | -0.478 |
| VEGFA  | hsa-miR-15a-5p  | 6:43752575-43752598   | 5.40E-11 | -0.313 |
| VEGFA  | hsa-miR-106b-5p | 6:43753095-43753114   | 1.84E-11 | -0.320 |
| VEGFA  | hsa-miR-106b-5p | 6:43754192-43754212   | 1.84E-11 | -0.320 |
| VEGFA  | hsa-miR-93-5p   | 6:43752478-43752499   | 1.29E-12 | -0.337 |
| VEGFA  | hsa-miR-141-5p  | 6:43753153-43753173   | 7.48E-11 | -0.311 |
| VEGFA  | hsa-miR-93-5p   | 6:43753088-43753114   | 2.76E-11 | -0.317 |
| VEGFA  | hsa-miR-361-5p  | 6:43752363-43752384   | 1.01E-10 | -0.309 |
| VEGFA  | hsa-miR-141-5p  | 6:43753256-43753277   | 7.48E-11 | -0.311 |
| VEGFA  | hsa-miR-106b-5p | 6:43752481-43752499   | 7.57E-13 | -0.340 |
| VEGFA  | hsa-miR-361-5p  | 6:43753919-43753940   | 1.52E-10 | -0.306 |
| VEGFA  | hsa-miR-141-5p  | 6:43752597-43752619   | 6.05E-11 | -0.312 |
| GCLC   | hsa-miR-30c-5p  | 6:53362324-53362303   | 2.44E-17 | -0.397 |
| GCLC   | hsa-miR-30e-5p  | 6:53362527-53362505   | 1.69E-27 | -0.496 |
| GCLC   | hsa-miR-30e-5p  | 6:53362330-53362309   | 1.69E-27 | -0.496 |
| GCLC   | hsa-miR-30c-5p  | 6:53363220-53363199   | 2.44E-17 | -0.397 |
| GCLC   | hsa-miR-30d-5p  | 6:53362321-53362303   | 1.61E-10 | -0.305 |
| GCLC   | hsa-miR-30c-5p  | 6:53362408-53362384   | 2.44E-17 | -0.397 |
| GCLC   | hsa-miR-30e-5p  | 6:53363221-53363199   | 1.69E-27 | -0.496 |
| GCLC   | hsa-miR-30d-5p  | 6:53363221-53363199   | 1.61E-10 | -0.305 |
| GCLC   | hsa-miR-30d-5p  | 6:53362526-53362505   | 1.61E-10 | -0.305 |
| MAP3K7 | hsa-miR-15a-5p  | 6:91226218-91226203   | 2.85E-10 | -0.301 |
| MAP3K7 | hsa-miR-15a-5p  | 6:91226108-91226085   | 2.85E-10 | -0.301 |
| MAP3K7 | hsa-miR-15a-5p  | 6:91225903-91225888   | 2.85E-10 | -0.301 |
| MAP3K7 | hsa-miR-15a-5p  | 6:91225965-91225938   | 2.85E-10 | -0.301 |
| SOD2   | hsa-miR-222-5p  | 6:160103372-160103348 | 2.13E-10 | -0.303 |
| SOD2   | hsa-miR-222-5p  | 6:160103454-160103432 | 2.13E-10 | -0.303 |

|          |                 |                       |          |        |
|----------|-----------------|-----------------------|----------|--------|
| SOD2     | hsa-miR-222-5p  | 6:160103079-160103056 | 6.23E-12 | -0.327 |
| SOD2     | hsa-miR-130a-5p | 6:160103001-160102974 | 5.21E-11 | -0.339 |
| SOD2     | hsa-miR-130a-5p | 6:160103338-160103314 | 5.70E-10 | -0.321 |
| SOD2     | hsa-miR-130a-5p | 6:160102788-160102768 | 5.21E-11 | -0.339 |
| WIPI2    | hsa-miR-15a-5p  | 7:5270763-5270784     | 2.02E-12 | -0.334 |
| WIPI2    | hsa-miR-15a-5p  | 7:5270626-5270650     | 2.62E-12 | -0.333 |
| WIPI2    | hsa-miR-15a-5p  | 7:5270583-5270607     | 2.62E-12 | -0.333 |
| RAC1     | hsa-miR-320a    | 7:6442730-6442749     | 8.44E-13 | -0.340 |
| RAC1     | hsa-miR-320a    | 7:6443257-6443278     | 8.44E-13 | -0.340 |
| RAC1     | hsa-miR-320a    | 7:6442231-6442257     | 8.44E-13 | -0.340 |
| RAC1     | hsa-miR-320a    | 7:6442080-6442099     | 7.67E-12 | -0.326 |
| AVL9     | hsa-miR-146b-5p | 7:32623729-32623751   | 5.79E-12 | -0.328 |
| SUMF2    | hsa-miR-148b-3p | 7:56147327-56147349   | 1.27E-11 | -0.323 |
| CROT     | hsa-miR-17-5p   | 7:87028527-87028549   | 1.31E-10 | -0.307 |
| CROT     | hsa-miR-17-5p   | 7:87028332-87028356   | 1.31E-10 | -0.307 |
| CROT     | hsa-miR-33a-5p  | 7:87028232-87028259   | 9.87E-11 | -0.310 |
| CROT     | hsa-miR-33a-5p  | 7:87028315-87028334   | 9.87E-11 | -0.310 |
| CROT     | hsa-miR-33a-5p  | 7:87028163-87028183   | 9.87E-11 | -0.310 |
| CROT     | hsa-miR-17-5p   | 7:87027965-87027986   | 1.31E-10 | -0.307 |
| COL1A2   | hsa-miR-29c-3p  | 7:94060322-94060342   | 9.02E-11 | -0.309 |
| COL1A2   | hsa-miR-29c-3p  | 7:94059835-94059856   | 9.02E-11 | -0.309 |
| SNX13    | hsa-miR-21-3p   | 7:17833665-17833649   | 2.89E-14 | -0.360 |
| SNX13    | hsa-miR-21-3p   | 7:17833664-17833643   | 2.89E-14 | -0.360 |
| GTF2IRD2 | hsa-miR-27a-3p  | 7:74210589-74210569   | 5.44E-12 | -0.328 |
| GTF2IRD2 | hsa-miR-27a-3p  | 7:74210646-74210627   | 5.44E-12 | -0.328 |
| GTF2IRD2 | hsa-miR-27a-3p  | 7:74210539-74210521   | 5.44E-12 | -0.328 |
| C7orf43  | hsa-miR-30e-5p  | 7:99752178-99752157   | 7.17E-12 | -0.326 |
| C7orf43  | hsa-miR-30e-5p  | 7:99752510-99752491   | 1.63E-15 | -0.376 |
| C7orf43  | hsa-miR-30e-5p  | 7:99752347-99752326   | 7.17E-12 | -0.326 |
| ADAM9    | hsa-miR-30e-5p  | 8:38961553-38961571   | 1.63E-10 | -0.305 |
| ADAM9    | hsa-miR-30e-5p  | 8:38962149-38962173   | 1.63E-10 | -0.305 |
| IKBKB    | hsa-miR-151a-3p | 8:42189745-42189768   | 1.13E-17 | -0.401 |
| IKBKB    | hsa-miR-200c-3p | 8:42189899-42189925   | 3.34E-23 | -0.458 |
| IKBKB    | hsa-miR-200c-3p | 8:42188499-42188520   | 3.78E-20 | -0.428 |
| IKBKB    | hsa-miR-200c-3p | 8:42188886-42188907   | 2.21E-23 | -0.460 |
| IKBKB    | hsa-miR-200c-3p | 8:42189384-42189405   | 5.51E-13 | -0.342 |
| IKBKB    | hsa-miR-151a-3p | 8:42188498-42188518   | 5.55E-12 | -0.328 |
| IKBKB    | hsa-miR-151a-3p | 8:42189365-42189385   | 3.00E-10 | -0.301 |
| ZFPM2    | hsa-miR-429     | 8:106815965-106815985 | 1.14E-10 | -0.308 |
| ZFPM2    | hsa-miR-200c-3p | 8:106816500-106816524 | 1.27E-29 | -0.513 |
| ZFPM2    | hsa-miR-429     | 8:106816501-106816524 | 2.19E-10 | -0.303 |
| ZFPM2    | hsa-miR-200b-3p | 8:106815776-106815803 | 3.48E-14 | -0.359 |
| ZFPM2    | hsa-miR-200c-3p | 8:106815775-106815803 | 1.49E-28 | -0.505 |
| ZFPM2    | hsa-miR-200c-3p | 8:106815962-106815985 | 4.08E-30 | -0.517 |
| ZFPM2    | hsa-miR-141-3p  | 8:106815966-106815985 | 6.38E-24 | -0.465 |
| ZFPM2    | hsa-miR-200b-3p | 8:106815966-106815985 | 1.38E-14 | -0.364 |
| ZFPM2    | hsa-miR-200b-3p | 8:106816501-106816524 | 3.34E-14 | -0.359 |

|        |                 |                        |          |        |
|--------|-----------------|------------------------|----------|--------|
| ZFPM2  | hsa-miR-200a-3p | 8:106816501-106816524  | 1.72E-15 | -0.375 |
| ZFPM2  | hsa-miR-141-3p  | 8:106816501-106816524  | 1.10E-23 | -0.463 |
| ZFPM2  | hsa-miR-141-3p  | 8:106815783-106815803  | 7.50E-21 | -0.435 |
| ZFPM2  | hsa-miR-200a-3p | 8:106815776-106815803  | 1.65E-14 | -0.363 |
| ZFPM2  | hsa-miR-200a-3p | 8:106815966-106815985  | 6.74E-16 | -0.380 |
| ZFPM2  | hsa-miR-429     | 8:106815783-106815803  | 3.24E-10 | -0.301 |
| ZFAND1 | hsa-miR-125a-5p | 8:82614919-82614897    | 4.14E-13 | -0.344 |
| ZFAND1 | hsa-miR-125a-5p | 8:82614343-82614323    | 9.00E-13 | -0.339 |
| ZFAND1 | hsa-miR-125a-5p | 8:82614031-82614008    | 9.00E-13 | -0.339 |
| DERL1  | hsa-miR-27a-3p  | 8:124026222-124026202  | 1.70E-10 | -0.305 |
| DERL1  | hsa-miR-27a-3p  | 8:124027498-124027479  | 6.47E-13 | -0.341 |
| EHMT1  | hsa-miR-30e-5p  | 9:140729418-140729441  | 5.26E-11 | -0.313 |
| EHMT1  | hsa-miR-30e-5p  | 9:140730499-140730522  | 5.26E-11 | -0.313 |
| EHMT1  | hsa-miR-30e-5p  | 9:140729979-140730000  | 5.26E-11 | -0.313 |
| EHMT1  | hsa-miR-30e-5p  | 9:140730480-140730497  | 5.26E-11 | -0.313 |
| STOML2 | hsa-miR-320a    | 9:35099967-35099942    | 1.47E-12 | -0.336 |
| STOML2 | hsa-miR-320a    | 9:35099984-35099963    | 1.08E-12 | -0.338 |
| PHF19  | hsa-miR-15b-5p  | 9:123618758-123618735  | 9.74E-11 | -0.309 |
| PHF19  | hsa-miR-15b-5p  | 9:123618862-123618838  | 9.74E-11 | -0.309 |
| PHF19  | hsa-miR-15b-5p  | 9:123619735-123619714  | 9.74E-11 | -0.309 |
| BMI1   | hsa-miR-200b-3p | 10:22619869-22619891   | 1.08E-13 | -0.352 |
| BMI1   | hsa-miR-200b-3p | 10:22619213-22619236   | 1.08E-13 | -0.352 |
| BMI1   | hsa-miR-200b-3p | 10:22619751-22619778   | 1.08E-13 | -0.352 |
| INPP5F | hsa-miR-155-5p  | 10:121587732-121587758 | 2.01E-11 | -0.320 |
| INPP5F | hsa-miR-155-5p  | 10:121588549-121588571 | 2.71E-11 | -0.318 |
| INPP5F | hsa-miR-155-5p  | 10:121587892-121587923 | 2.71E-11 | -0.318 |
| PPP3CB | hsa-miR-30e-5p  | 10:75197720-75197699   | 1.12E-15 | -0.378 |
| PPP3CB | hsa-miR-30e-5p  | 10:75197049-75197029   | 1.12E-15 | -0.378 |
| PPP3CB | hsa-miR-30c-5p  | 10:75197056-75197029   | 3.35E-11 | -0.316 |
| PPP3CB | hsa-miR-30e-5p  | 10:75196719-75196683   | 3.12E-16 | -0.384 |
| PPP3CB | hsa-miR-30c-5p  | 10:75197182-75197159   | 3.35E-11 | -0.316 |
| PPP3CB | hsa-miR-30c-5p  | 10:75197721-75197699   | 3.35E-11 | -0.316 |
| MMS19  | hsa-miR-29c-3p  | 10:99218137-99218112   | 7.16E-12 | -0.326 |
| MMS19  | hsa-miR-29c-3p  | 10:99218184-99218168   | 7.16E-12 | -0.326 |
| ACTR1A | hsa-miR-377-5p  | 10:104239268-104239250 | 3.57E-31 | -0.539 |
| ACTR1A | hsa-miR-377-5p  | 10:104239070-104239050 | 3.57E-31 | -0.539 |
| ACTR1A | hsa-miR-377-5p  | 10:104239771-104239749 | 3.57E-31 | -0.539 |
| CCS    | hsa-miR-1307-3p | 11:66373391-66373414   | 1.05E-12 | -0.338 |
| CCS    | hsa-miR-1307-3p | 11:66373347-66373369   | 3.37E-12 | -0.331 |
| CCS    | hsa-miR-1307-3p | 11:66373432-66373451   | 1.05E-12 | -0.338 |
| EED    | hsa-miR-30e-5p  | 11:85989583-85989604   | 1.29E-15 | -0.377 |
| EED    | hsa-miR-30e-5p  | 11:85989691-85989711   | 1.29E-15 | -0.377 |
| EED    | hsa-miR-30c-5p  | 11:85989587-85989604   | 4.90E-11 | -0.314 |
| EED    | hsa-miR-30c-5p  | 11:85989685-85989711   | 4.90E-11 | -0.314 |
| SIDT2  | hsa-miR-15a-5p  | 11:117067012-117067031 | 2.22E-10 | -0.303 |
| CLPB   | hsa-miR-200b-3p | 11:72004410-72004400   | 3.13E-10 | -0.301 |
| PCSK7  | hsa-miR-652-3p  | 11:117076709-117076684 | 3.22E-11 | -0.316 |

|          |                 |                        |          |        |
|----------|-----------------|------------------------|----------|--------|
| PCSK7    | hsa-miR-652-3p  | 11:117076548-117076527 | 3.22E-11 | -0.316 |
| PCSK7    | hsa-miR-652-3p  | 11:117076051-117076033 | 3.22E-11 | -0.316 |
| PCSK7    | hsa-miR-652-3p  | 11:117076482-117076462 | 3.22E-11 | -0.316 |
| BACE1    | hsa-miR-107     | 11:117158505-117158480 | 2.96E-10 | -0.301 |
| BACE1    | hsa-miR-107     | 11:117158958-117158933 | 2.96E-10 | -0.301 |
| BACE1    | hsa-miR-107     | 11:117158123-117158096 | 2.96E-10 | -0.301 |
| BACE1    | hsa-miR-17-5p   | 11:117157278-117157255 | 3.13E-12 | -0.332 |
| BACE1    | hsa-miR-17-5p   | 11:117160243-117160223 | 2.67E-12 | -0.333 |
| BACE1    | hsa-miR-17-5p   | 11:117158511-117158487 | 4.96E-12 | -0.329 |
| H2AFX    | hsa-miR-320a    | 11:118965119-118965096 | 7.67E-13 | -0.340 |
| H2AFX    | hsa-miR-320a    | 11:118965012-118964991 | 7.67E-13 | -0.340 |
| RPUSD4   | hsa-miR-30d-5p  | 11:126073232-126073211 | 1.81E-11 | -0.320 |
| RPUSD4   | hsa-miR-30d-5p  | 11:126072971-126072947 | 1.81E-11 | -0.320 |
| RPUSD4   | hsa-miR-30d-5p  | 11:126072488-126072470 | 1.81E-11 | -0.320 |
| SRPR     | hsa-miR-30e-5p  | 11:126133280-126133260 | 1.39E-13 | -0.350 |
| SRPR     | hsa-miR-30e-5p  | 11:126133763-126133737 | 5.47E-14 | -0.356 |
| SRPR     | hsa-miR-30e-5p  | 11:126132900-126132879 | 1.39E-13 | -0.350 |
| NCAPD3   | hsa-miR-1-3p    | 11:134022496-134022469 | 6.70E-21 | -0.436 |
| NCAPD3   | hsa-miR-1-3p    | 11:134022603-134022581 | 6.70E-21 | -0.436 |
| NCAPD3   | hsa-miR-1-3p    | 11:134022763-134022742 | 6.70E-21 | -0.436 |
| ERC1     | hsa-miR-1307-3p | 12:1599401-1599422     | 2.52E-10 | -0.302 |
| ERC1     | hsa-miR-1307-3p | 12:1599401-1599422     | 2.52E-10 | -0.302 |
| SSPN     | hsa-miR-378a-5p | 12:26384585-26384605   | 6.98E-12 | -0.326 |
| SSPN     | hsa-miR-378a-5p | 12:26384447-26384472   | 6.98E-12 | -0.326 |
| LMBR1L   | hsa-miR-30e-5p  | 12:49491211-49491193   | 1.26E-12 | -0.337 |
| LMBR1L   | hsa-miR-30e-5p  | 12:49491163-49491142   | 1.26E-12 | -0.337 |
| LMBR1L   | hsa-miR-30d-5p  | 12:49491211-49491193   | 3.45E-11 | -0.316 |
| LMBR1L   | hsa-miR-30e-5p  | 12:49490954-49490935   | 2.28E-16 | -0.386 |
| LMBR1L   | hsa-miR-30d-5p  | 12:49491163-49491142   | 3.45E-11 | -0.316 |
| LMBR1L   | hsa-miR-30c-5p  | 12:49490948-49490926   | 3.00E-15 | -0.372 |
| SART3    | hsa-let-7g-5p   | 12:108917069-108917051 | 3.04E-12 | -0.332 |
| RHOF     | hsa-miR-148b-3p | 12:122217352-122217329 | 4.53E-11 | -0.314 |
| RHOF     | hsa-miR-148b-3p | 12:122217318-122217297 | 2.68E-10 | -0.302 |
| RHOF     | hsa-miR-148b-3p | 12:122216582-122216562 | 2.68E-10 | -0.302 |
| KL       | hsa-miR-335-5p  | 13:33639074-33639098   | 8.79E-15 | -0.367 |
| KL       | hsa-miR-335-5p  | 13:33639730-33639757   | 8.79E-15 | -0.367 |
| KL       | hsa-miR-335-5p  | 13:33639412-33639432   | 8.79E-15 | -0.367 |
| RNASEH2B | hsa-miR-940     | 13:51544336-51544356   | 3.22E-10 | -0.302 |
| RNASEH2B | hsa-miR-940     | 13:51544118-51544142   | 3.22E-10 | -0.302 |
| RNASEH2B | hsa-miR-940     | 13:51544274-51544294   | 3.22E-10 | -0.302 |
| IRF9     | hsa-miR-106b-5p | 14:24635421-24635440   | 1.34E-13 | -0.351 |
| IRF9     | hsa-miR-106b-5p | 14:24635696-24635717   | 1.34E-13 | -0.351 |
| IRF9     | hsa-miR-106b-5p | 14:24635480-24635498   | 1.06E-14 | -0.365 |
| EIF2S1   | hsa-miR-222-3p  | 14:67851592-67851612   | 1.64E-14 | -0.363 |
| EIF2S1   | hsa-miR-222-3p  | 14:67852083-67852106   | 1.64E-14 | -0.363 |
| EIF2S1   | hsa-miR-21-5p   | 14:67850630-67850650   | 2.06E-15 | -0.374 |
| EIF2S1   | hsa-miR-21-5p   | 14:67850938-67850959   | 2.38E-12 | -0.333 |



|         |                 |                        |          |        |
|---------|-----------------|------------------------|----------|--------|
| EIF2S1  | hsa-miR-21-5p   | 14:67852323-67852344   | 2.38E-12 | -0.333 |
| EIF2S1  | hsa-miR-222-3p  | 14:67851242-67851262   | 1.64E-14 | -0.363 |
| DNAL1   | hsa-miR-766-3p  | 14:74163864-74163883   | 7.37E-11 | -0.311 |
| DNAL1   | hsa-miR-766-3p  | 14:74166030-74166061   | 8.51E-11 | -0.310 |
| DNAL1   | hsa-miR-766-3p  | 14:74168871-74168896   | 8.51E-11 | -0.310 |
| ZFYVE21 | hsa-miR-92a-3p  | 14:104199455-104199474 | 9.39E-12 | -0.324 |
| ZFYVE21 | hsa-miR-92a-3p  | 14:104199369-104199390 | 9.39E-12 | -0.324 |
| ZFYVE21 | hsa-miR-32-5p   | 14:104199562-104199583 | 8.01E-15 | -0.367 |
| ZFYVE21 | hsa-miR-20a-5p  | 14:104199779-104199802 | 3.79E-14 | -0.358 |
| ZFYVE21 | hsa-miR-20a-5p  | 14:104199942-104199964 | 3.79E-14 | -0.358 |
| ZFYVE21 | hsa-miR-92a-3p  | 14:104199501-104199522 | 9.39E-12 | -0.324 |
| ZFYVE21 | hsa-miR-106b-5p | 14:104199903-104199921 | 4.37E-26 | -0.484 |
| ZFYVE21 | hsa-miR-17-5p   | 14:104199901-104199921 | 1.22E-16 | -0.389 |
| ZFYVE21 | hsa-miR-93-5p   | 14:104199942-104199964 | 1.57E-17 | -0.400 |
| ZFYVE21 | hsa-miR-17-5p   | 14:104199942-104199964 | 1.22E-16 | -0.389 |
| ZFYVE21 | hsa-miR-17-5p   | 14:104199779-104199802 | 1.22E-16 | -0.389 |
| ZFYVE21 | hsa-miR-25-3p   | 14:104199502-104199522 | 6.21E-12 | -0.327 |
| ZFYVE21 | hsa-miR-20a-5p  | 14:104199901-104199921 | 3.79E-14 | -0.358 |
| ZFYVE21 | hsa-miR-106b-5p | 14:104199781-104199802 | 4.37E-26 | -0.484 |
| ZFYVE21 | hsa-miR-32-5p   | 14:104199737-104199763 | 8.01E-15 | -0.367 |
| ZFYVE21 | hsa-miR-25-3p   | 14:104199455-104199474 | 6.21E-12 | -0.327 |
| ZFYVE21 | hsa-miR-93-5p   | 14:104199899-104199921 | 1.57E-17 | -0.400 |
| ZFYVE21 | hsa-miR-32-5p   | 14:104199502-104199522 | 8.01E-15 | -0.367 |
| ZFYVE21 | hsa-miR-93-5p   | 14:104199782-104199802 | 1.57E-17 | -0.400 |
| ZFYVE21 | hsa-miR-106b-5p | 14:104199944-104199964 | 4.37E-26 | -0.484 |
| ZFYVE21 | hsa-miR-25-3p   | 14:104199369-104199390 | 6.21E-12 | -0.327 |
| ZFYVE26 | hsa-miR-93-5p   | 14:68215150-68215124   | 6.99E-13 | -0.341 |
| ZFYVE26 | hsa-miR-93-5p   | 14:68214720-68214699   | 6.51E-13 | -0.341 |
| ZFYVE26 | hsa-miR-106b-5p | 14:68214721-68214699   | 1.99E-10 | -0.304 |
| ZFYVE26 | hsa-miR-93-5p   | 14:68214813-68214793   | 6.99E-13 | -0.341 |
| ZFYVE26 | hsa-miR-106b-5p | 14:68215148-68215124   | 1.91E-10 | -0.304 |
| ZFYVE26 | hsa-miR-106b-5p | 14:68214817-68214793   | 1.91E-10 | -0.304 |
| ZFYVE26 | hsa-miR-93-5p   | 14:68213513-68213487   | 6.51E-13 | -0.341 |
| ZFYVE26 | hsa-miR-106b-5p | 14:68213511-68213487   | 1.99E-10 | -0.304 |
| ACTN1   | hsa-miR-1-3p    | 14:69341191-69341171   | 2.45E-12 | -0.333 |
| ACTN1   | hsa-miR-1-3p    | 14:69341247-69341226   | 2.45E-12 | -0.333 |
| ACTN1   | hsa-miR-1-3p    | 14:69340901-69340879   | 3.73E-34 | -0.547 |
| ARIH1   | hsa-let-7g-5p   | 15:72875635-72875656   | 1.36E-12 | -0.337 |
| ARIH1   | hsa-let-7g-5p   | 15:72877475-72877495   | 1.36E-12 | -0.337 |
| ARIH1   | hsa-let-7g-5p   | 15:72878038-72878063   | 1.36E-12 | -0.337 |
| ARIH1   | hsa-let-7g-5p   | 15:72877381-72877401   | 1.36E-12 | -0.337 |
| CD276   | hsa-miR-29c-3p  | 15:74006622-74006643   | 3.16E-10 | -0.301 |
| CD276   | hsa-miR-29c-3p  | 15:74006213-74006230   | 3.16E-10 | -0.301 |
| UNC45A  | hsa-miR-125a-5p | 15:91497135-91497160   | 3.41E-10 | -0.300 |
| UNC45A  | hsa-miR-125a-5p | 15:91497266-91497292   | 3.41E-10 | -0.300 |
| UNC45A  | hsa-miR-125a-5p | 15:91496956-91496977   | 3.41E-10 | -0.300 |
| PKM     | hsa-miR-30c-5p  | 15:72491598-72491575   | 3.33E-12 | -0.331 |

|          |                 |                      |          |        |
|----------|-----------------|----------------------|----------|--------|
| PKM      | hsa-miR-30c-5p  | 15:72491847-72491825 | 3.33E-12 | -0.331 |
| PKM      | hsa-miR-30c-5p  | 15:72491530-72491508 | 3.33E-12 | -0.331 |
| RAB40C   | hsa-let-7g-5p   | 16:678385-678404     | 1.35E-12 | -0.337 |
| RAB40C   | hsa-let-7g-5p   | 16:678786-678808     | 1.35E-12 | -0.337 |
| RAB40C   | hsa-miR-29c-3p  | 16:677984-678001     | 9.30E-13 | -0.339 |
| RAB40C   | hsa-miR-29c-3p  | 16:678776-678796     | 9.30E-13 | -0.339 |
| RAB40C   | hsa-miR-29c-3p  | 16:677817-677838     | 9.30E-13 | -0.339 |
| RAB40C   | hsa-let-7g-5p   | 16:677713-677734     | 1.35E-12 | -0.337 |
| POLR3E   | hsa-miR-98-5p   | 16:22345157-22345183 | 4.92E-11 | -0.314 |
| POLR3E   | hsa-miR-30c-5p  | 16:22345225-22345252 | 1.34E-10 | -0.307 |
| POLR3E   | hsa-miR-98-5p   | 16:22345114-22345136 | 4.92E-11 | -0.314 |
| POLR3E   | hsa-miR-30e-5p  | 16:22345155-22345179 | 2.92E-19 | -0.419 |
| POLR3E   | hsa-miR-30e-5p  | 16:22345182-22345206 | 2.92E-19 | -0.419 |
| POLR3E   | hsa-miR-30e-5p  | 16:22345229-22345252 | 2.92E-19 | -0.419 |
| PHKB     | hsa-miR-15a-5p  | 16:47733538-47733560 | 5.33E-11 | -0.313 |
| CHD9     | hsa-miR-342-3p  | 16:53359621-53359641 | 5.02E-11 | -0.313 |
| CHD9     | hsa-miR-342-3p  | 16:53359197-53359218 | 5.02E-11 | -0.313 |
| CRISPLD2 | hsa-miR-106b-5p | 16:84940250-84940270 | 4.99E-16 | -0.382 |
| CRISPLD2 | hsa-miR-106b-5p | 16:84941101-84941124 | 2.15E-15 | -0.374 |
| CRISPLD2 | hsa-miR-676-3p  | 16:84940255-84940274 | 1.90E-14 | -0.421 |
| CRISPLD2 | hsa-miR-106b-5p | 16:84940361-84940382 | 4.99E-16 | -0.382 |
| CRISPLD2 | hsa-miR-676-3p  | 16:84942816-84942836 | 5.95E-14 | -0.414 |
| CRISPLD2 | hsa-miR-676-3p  | 16:84941104-84941122 | 5.95E-14 | -0.414 |
| CRISPLD2 | hsa-miR-106b-5p | 16:84941542-84941565 | 2.15E-15 | -0.374 |
| CRISPLD2 | hsa-miR-676-3p  | 16:84942415-84942434 | 5.95E-14 | -0.414 |
| CRISPLD2 | hsa-miR-93-5p   | 16:84941543-84941565 | 1.16E-12 | -0.338 |
| CRISPLD2 | hsa-miR-93-5p   | 16:84941594-84941621 | 1.16E-12 | -0.338 |
| CRISPLD2 | hsa-miR-93-5p   | 16:84941099-84941124 | 1.16E-12 | -0.338 |
| ZC3H18   | hsa-miR-29b-5p  | 16:88698311-88698329 | 6.24E-13 | -0.344 |
| ZNF200   | hsa-miR-30e-5p  | 16:3273411-3273386   | 4.05E-13 | -0.344 |
| ZNF200   | hsa-miR-30e-5p  | 16:3273385-3273358   | 4.05E-13 | -0.344 |
| DCTPP1   | hsa-miR-1-3p    | 16:30435230-30435208 | 5.29E-16 | -0.382 |
| DCTPP1   | hsa-miR-1-3p    | 16:30435104-30435083 | 5.29E-16 | -0.382 |
| PHLPP2   | hsa-miR-141-3p  | 16:71682306-71682281 | 8.80E-11 | -0.310 |
| PHLPP2   | hsa-miR-141-3p  | 16:71682492-71682470 | 8.80E-11 | -0.310 |
| PHLPP2   | hsa-miR-141-3p  | 16:71681350-71681326 | 9.17E-11 | -0.309 |
| ANKRD13B | hsa-miR-423-5p  | 17:27941192-27941214 | 2.25E-10 | -0.303 |
| ANKRD13B | hsa-miR-423-5p  | 17:27941104-27941128 | 2.25E-10 | -0.303 |
| ANKRD13B | hsa-miR-423-5p  | 17:27941083-27941105 | 2.25E-10 | -0.303 |
| NPEPPS   | hsa-miR-141-5p  | 17:45699583-45699610 | 4.77E-12 | -0.329 |
| NPEPPS   | hsa-miR-141-5p  | 17:45700517-45700540 | 4.77E-12 | -0.329 |
| NPEPPS   | hsa-miR-141-5p  | 17:45699808-45699829 | 4.77E-12 | -0.329 |
| PCTP     | hsa-miR-125b-5p | 17:53854424-53854445 | 3.66E-11 | -0.316 |
| PCTP     | hsa-miR-125b-5p | 17:53854545-53854568 | 3.66E-11 | -0.316 |
| PCTP     | hsa-miR-125b-5p | 17:53853486-53853507 | 3.66E-11 | -0.316 |
| MAP3K3   | hsa-miR-106b-5p | 17:61771154-61771172 | 1.52E-15 | -0.376 |
| MAP3K3   | hsa-miR-93-5p   | 17:61771152-61771172 | 4.08E-11 | -0.315 |

|          |                 |                      |          |        |
|----------|-----------------|----------------------|----------|--------|
| MAP3K3   | hsa-miR-96-5p   | 17:61771141-61771167 | 3.49E-10 | -0.300 |
| ANKFY1   | hsa-miR-101-3p  | 17:4069995-4069972   | 9.03E-15 | -0.366 |
| ANKFY1   | hsa-miR-101-3p  | 17:4070298-4070279   | 9.03E-15 | -0.366 |
| ANKFY1   | hsa-miR-101-3p  | 17:4068972-4068949   | 1.21E-14 | -0.365 |
| CTC1     | hsa-miR-146b-3p | 17:8130781-8130761   | 6.56E-12 | -0.327 |
| CTC1     | hsa-miR-146b-3p | 17:8131497-8131485   | 6.56E-12 | -0.327 |
| PIGS     | hsa-miR-29c-3p  | 17:26880538-26880517 | 4.85E-18 | -0.405 |
| PIGS     | hsa-miR-29c-3p  | 17:26880717-26880693 | 4.85E-18 | -0.405 |
| PIGS     | hsa-miR-29c-3p  | 17:26881204-26881183 | 6.12E-18 | -0.404 |
| RAB34    | hsa-miR-454-3p  | 17:27041344-27041322 | 1.28E-15 | -0.377 |
| RAB34    | hsa-miR-454-3p  | 17:27041591-27041571 | 2.61E-10 | -0.302 |
| RAB34    | hsa-miR-454-3p  | 17:27041389-27041367 | 1.24E-10 | -0.308 |
| RAB34    | hsa-miR-148b-3p | 17:27041346-27041321 | 9.53E-11 | -0.309 |
| RAB34    | hsa-miR-301a-3p | 17:27041345-27041322 | 3.87E-11 | -0.316 |
| RAB34    | hsa-miR-454-3p  | 17:27041653-27041633 | 2.61E-10 | -0.302 |
| CRLF3    | hsa-miR-200c-3p | 17:29110592-29110571 | 4.28E-13 | -0.344 |
| CRLF3    | hsa-miR-200b-3p | 17:29110248-29110228 | 1.44E-11 | -0.322 |
| CRLF3    | hsa-miR-200c-3p | 17:29110246-29110228 | 4.28E-13 | -0.344 |
| CRLF3    | hsa-miR-200b-3p | 17:29110595-29110571 | 1.44E-11 | -0.322 |
| CRLF3    | hsa-miR-200b-3p | 17:29111041-29111020 | 2.06E-11 | -0.319 |
| CRLF3    | hsa-miR-200c-3p | 17:29110549-29110525 | 4.28E-13 | -0.344 |
| EZH1     | hsa-miR-93-5p   | 17:40854543-40854522 | 1.86E-10 | -0.304 |
| EZH1     | hsa-miR-16-5p   | 17:40853730-40853711 | 1.87E-11 | -0.320 |
| EZH1     | hsa-miR-93-5p   | 17:40852364-40852336 | 2.72E-10 | -0.302 |
| EZH1     | hsa-miR-15b-5p  | 17:40854494-40854477 | 7.70E-14 | -0.354 |
| EZH1     | hsa-miR-15b-5p  | 17:40853730-40853711 | 1.00E-13 | -0.352 |
| EZH1     | hsa-miR-16-5p   | 17:40853614-40853594 | 1.87E-11 | -0.320 |
| EZH1     | hsa-miR-16-5p   | 17:40854497-40854477 | 1.35E-11 | -0.322 |
| EZH1     | hsa-miR-15b-5p  | 17:40853619-40853594 | 1.00E-13 | -0.352 |
| EZH1     | hsa-miR-93-5p   | 17:40853344-40853321 | 2.72E-10 | -0.302 |
| TMEM101  | hsa-miR-589-5p  | 17:42089292-42089270 | 4.64E-13 | -0.343 |
| TMEM101  | hsa-miR-20b-3p  | 17:42088902-42088881 | 8.13E-11 | -0.339 |
| TMEM101  | hsa-miR-20b-3p  | 17:42089106-42089075 | 2.69E-13 | -0.379 |
| TMEM101  | hsa-miR-20b-3p  | 17:42088826-42088796 | 8.13E-11 | -0.339 |
| SLC25A39 | hsa-miR-103a-3p | 17:42397109-42397088 | 1.47E-11 | -0.322 |
| SLC25A39 | hsa-miR-103a-3p | 17:42397199-42397177 | 1.47E-11 | -0.322 |
| SLC25A39 | hsa-miR-103a-3p | 17:42397248-42397225 | 1.61E-11 | -0.321 |
| H3F3B    | hsa-miR-27a-3p  | 17:73772858-73772838 | 1.26E-10 | -0.307 |
| H3F3B    | hsa-miR-27a-3p  | 17:73774300-73774279 | 1.26E-10 | -0.307 |
| H3F3B    | hsa-miR-27a-3p  | 17:73772943-73772923 | 1.26E-10 | -0.307 |
| H3F3B    | hsa-miR-223-5p  | 17:73774670-73774650 | 7.62E-10 | -0.302 |
| PRPSAP1  | hsa-miR-16-5p   | 17:74307435-74307409 | 1.65E-10 | -0.305 |
| PRPSAP1  | hsa-miR-16-5p   | 17:74307122-74307103 | 1.65E-10 | -0.305 |
| PRPSAP1  | hsa-miR-16-5p   | 17:74307394-74307374 | 1.65E-10 | -0.305 |
| KIAA1328 | hsa-miR-98-5p   | 18:34803106-34803128 | 2.70E-10 | -0.302 |
| KIAA1328 | hsa-miR-98-5p   | 18:34804317-34804339 | 3.32E-10 | -0.300 |
| KIAA1328 | hsa-miR-98-5p   | 18:34803241-34803264 | 2.70E-10 | -0.302 |

|          |                 |                      |          |        |
|----------|-----------------|----------------------|----------|--------|
| COLEC12  | hsa-miR-148b-3p | 18:319865-319839     | 4.32E-15 | -0.370 |
| COLEC12  | hsa-let-7g-5p   | 18:319816-319797     | 6.94E-14 | -0.355 |
| COLEC12  | hsa-miR-148b-3p | 18:320043-320022     | 4.32E-15 | -0.370 |
| COLEC12  | hsa-miR-148b-3p | 18:319959-319938     | 4.32E-15 | -0.370 |
| COLEC12  | hsa-let-7g-5p   | 18:319562-319540     | 6.94E-14 | -0.355 |
| COLEC12  | hsa-miR-148b-3p | 18:319842-319816     | 4.32E-15 | -0.370 |
| COLEC12  | hsa-let-7g-5p   | 18:319443-319419     | 6.94E-14 | -0.355 |
| ANKRD29  | hsa-miR-93-5p   | 18:21180805-21180779 | 5.00E-11 | -0.313 |
| ANKRD29  | hsa-miR-93-5p   | 18:21180109-21180087 | 4.75E-11 | -0.314 |
| ANKRD29  | hsa-miR-93-5p   | 18:21180217-21180197 | 4.75E-11 | -0.314 |
| LRP3     | hsa-miR-93-5p   | 19:33698498-33698519 | 2.44E-10 | -0.303 |
| HNRNPUL1 | hsa-miR-191-5p  | 19:41812678-41812699 | 1.35E-11 | -0.322 |
| HNRNPUL1 | hsa-miR-191-5p  | 19:41812474-41812496 | 1.35E-11 | -0.322 |
| ZNF813   | hsa-miR-891a-5p | 19:53997144-53997171 | 4.29E-08 | -0.303 |
| ZNF813   | hsa-miR-891a-5p | 19:53995463-53995482 | 4.29E-08 | -0.303 |
| ZNF813   | hsa-miR-891a-5p | 19:53997179-53997201 | 4.29E-08 | -0.303 |
| MKNK2    | hsa-miR-21-5p   | 19:2039506-2039485   | 1.44E-11 | -0.322 |
| MKNK2    | hsa-miR-21-5p   | 19:2039568-2039545   | 1.44E-11 | -0.322 |
| MKNK2    | hsa-miR-21-5p   | 19:2037898-2037876   | 1.78E-11 | -0.320 |
| MYO1F    | hsa-miR-532-3p  | 19:8585780-8585763   | 1.69E-11 | -0.321 |
| MYO1F    | hsa-miR-532-3p  | 19:8585955-8585932   | 1.69E-11 | -0.321 |
| MYO1F    | hsa-miR-93-3p   | 19:8585909-8585887   | 7.91E-12 | -0.326 |
| MYO1F    | hsa-miR-93-3p   | 19:8586171-8586150   | 7.91E-12 | -0.326 |
| MYO1F    | hsa-miR-93-3p   | 19:8586272-8586251   | 7.91E-12 | -0.326 |
| MYO1F    | hsa-miR-532-3p  | 19:8586086-8586063   | 1.69E-11 | -0.321 |
| DMPK     | hsa-miR-103a-3p | 19:46273745-46273736 | 2.10E-12 | -0.334 |
| DMPK     | hsa-miR-15a-5p  | 19:46273745-46273725 | 1.47E-11 | -0.322 |
| DMPK     | hsa-miR-15a-5p  | 19:46273745-46273732 | 1.47E-11 | -0.322 |
| PYGB     | hsa-miR-34a-5p  | 20:25278267-25278287 | 7.02E-11 | -0.311 |
| PYGB     | hsa-miR-34a-5p  | 20:25277401-25277423 | 7.02E-11 | -0.311 |
| PYGB     | hsa-miR-34a-5p  | 20:25278580-25278603 | 7.02E-11 | -0.311 |
| CTSA     | hsa-miR-20a-5p  | 20:44527268-44527293 | 4.19E-12 | -0.330 |
| CTSA     | hsa-miR-20a-5p  | 20:44527162-44527182 | 4.19E-12 | -0.330 |
| CTSA     | hsa-miR-20a-5p  | 20:44527331-44527355 | 4.19E-12 | -0.330 |
| VAPB     | hsa-miR-22-3p   | 20:57022335-57022355 | 1.66E-14 | -0.363 |
| VAPB     | hsa-miR-22-3p   | 20:57021903-57021928 | 1.66E-14 | -0.363 |
| STX16    | hsa-miR-429     | 20:57254327-57254356 | 8.78E-11 | -0.310 |
| STX16    | hsa-miR-200b-3p | 20:57251662-57251683 | 3.48E-10 | -0.300 |
| STX16    | hsa-miR-429     | 20:57252145-57252166 | 8.78E-11 | -0.310 |
| STX16    | hsa-miR-429     | 20:57251647-57251683 | 8.78E-11 | -0.310 |
| STX16    | hsa-miR-200b-3p | 20:57252137-57252166 | 3.48E-10 | -0.300 |
| GNAS     | hsa-miR-93-5p   | 20:57485969-57485998 | 1.25E-10 | -0.307 |
| GNAS     | hsa-miR-93-5p   | 20:57486189-57486212 | 1.25E-10 | -0.307 |
| GNAS     | hsa-miR-93-5p   | 20:57485941-57485960 | 1.25E-10 | -0.307 |
| ARFGAP1  | hsa-miR-30c-5p  | 20:61920938-61920959 | 4.02E-12 | -0.330 |
| ARFGAP1  | hsa-miR-30c-5p  | 20:61919254-61919275 | 2.01E-12 | -0.334 |
| ARFGAP1  | hsa-miR-30c-5p  | 20:61920652-61920673 | 2.19E-12 | -0.334 |

|         |                 |                      |          |        |
|---------|-----------------|----------------------|----------|--------|
| GSS     | hsa-miR-125a-5p | 20:33516433-33516413 | 8.72E-11 | -0.310 |
| GSS     | hsa-miR-125a-5p | 20:33516347-33516320 | 8.72E-11 | -0.310 |
| USP25   | hsa-miR-200c-3p | 21:17251055-17251077 | 7.52E-13 | -0.340 |
| USP16   | hsa-miR-320a    | 21:30426520-30426551 | 1.09E-12 | -0.338 |
| BACE2   | hsa-miR-125a-5p | 21:42647785-42647810 | 9.46E-12 | -0.324 |
| BACE2   | hsa-miR-125a-5p | 21:42647995-42648018 | 9.46E-12 | -0.324 |
| BACE2   | hsa-miR-125a-5p | 21:42648293-42648319 | 9.46E-12 | -0.324 |
| C1QTNF6 | hsa-miR-29c-3p  | 22:37576436-37576415 | 2.86E-11 | -0.317 |
| C1QTNF6 | hsa-miR-29c-3p  | 22:37576641-37576620 | 2.86E-11 | -0.317 |
| C1QTNF6 | hsa-miR-29c-3p  | 22:37576385-37576367 | 2.86E-11 | -0.317 |

---
