# Supplementary material for: The effects of alternative splicing on miRNA binding sites in bladder cancer
Source: PubMed Central journal article supplement (PMC5754136; doi:10.1371/journal.pone.0190708), 2018-01-04
Supplement: pone.0190708.s005.pdf [file pone.0190708.s005.pdf]

**Table S2.** Pathway over-representation analysis of 37 genes associated with histology.

| Pathway name                                                                     | <i>p</i> -value | FDR <i>q</i> -value | Pathway source |
|----------------------------------------------------------------------------------|-----------------|---------------------|----------------|
| Photodynamic therapy-induced HIF-1 survival signaling                            | 8.33E-05        | 0.00475             | Wikipathways   |
| PRC2 complex sets long-term gene silencing through modification of histone tails | 0.000435        | 0.0124              | BioCarta       |
| Glucose metabolism                                                               | 0.00172         | 0.0291              | Reactome       |
| Alcoholism                                                                       | 0.00213         | 0.0291              | KEGG           |
| Amyloid fiber formation                                                          | 0.00285         | 0.0291              | Reactome       |
| Glucagon signaling pathway                                                       | 0.00307         | 0.0291              | KEGG           |
| Histone modification                                                             | 0.00379         | 0.0297              | Wikipathways   |
| PRC2 methylates histones and DNA                                                 | 0.00417         | 0.0297              | Reactome       |
| Warburg Effect                                                                   | 0.00736         | 0.0466              | Wikipathways   |
