# Supplementary material for: The effects of alternative splicing on miRNA binding sites in bladder cancer
Source: PubMed Central journal article supplement (PMC5754136; doi:10.1371/journal.pone.0190708), 2018-01-04
Supplement: pone.0190708.s006.pdf [file pone.0190708.s006.pdf]

**Table S3.** Pathway over-representation analysis of 16 genes associated with survival.

| Pathway name                                               | <i>p</i> -value | FDR <i>q</i> -value | Pathway source |
|------------------------------------------------------------|-----------------|---------------------|----------------|
| Glucose metabolism                                         | 1.36E-04        | 0.00203             | Reactome       |
| Photodynamic therapy-induced HIF-1 survival signaling      | 0.000646        | 0.00484             | Wikipathways   |
| Systemic lupus erythematosus                               | 0.00185         | 0.00923             | KEGG           |
| HIF-1 alpha transcription factor network                   | 0.0026          | 0.00925             | PID            |
| Metabolism of carbohydrates                                | 0.00308         | 0.00925             | Reactome       |
| Alcoholism                                                 | 0.00558         | 0.0139              | KEGG           |
| Glucagon signaling pathway                                 | 0.0068          | 0.0146              | KEGG           |
| Factors involved in megakaryocyte development and platelet | 0.00791         | 0.0148              | Reactome       |
